# Supplementary material for: Effect of intentional restriction of venous return on tissue oxygenation in a porcine model of acute limb ischemia
Source: PubMed Central journal article supplement (PMC7735909; doi:10.1371/journal.pone.0243033), 2020-12-14
Supplement: pone.0243033.s001.pdf [file pone.0243033.s001.pdf]

1 Table 1. Blood sampling of the SFA and CIV at different moments (From T0 to T7).

| SFA (percent) |              | CIV (percent) |              |
|---------------|--------------|---------------|--------------|
| T0            | 100          | T0            | 85.57 ± 1.72 |
| T1            | 98.43 ± 1.27 | T1            | 75.43 ± 8.44 |
| T2            | 98.29 ± 1.11 | T2            | 71.71 ± 5.93 |
| T3            | 97.57 ± 1.51 | T3            | 72.57 ± 6.35 |
| T4            | 97.71 ± 1.97 | T4            | 71.86 ± 7.58 |
| T5            | 98.29 ± 2.13 | T5            | 74.14 ± 9.56 |
| T6            | 98.29 ± 1.60 | T6            | 79.29 ± 4.82 |
| T7            | 98.57 ± 0.97 | T7            | 79.71 ± 4.78 |

2 Values are n (%) or mean ± SD, as appropriate. Abbreviations: SFA, supercificial

3 femoral artery; CIV, common iliac vein.
