# Supplementary material for: Effect of intentional restriction of venous return on tissue oxygenation in a porcine model of acute limb ischemia
Source: PubMed Central journal article supplement (PMC7735909; doi:10.1371/journal.pone.0243033), 2020-12-14
Supplement: pone.0243033.s002.pdf [file pone.0243033.s002.pdf]

6

7 **Table 2. Comparison of the venous oxygen saturations between the experimental**  
8 **limbs with arterial embolization and the control limbs.**

|    | Experimental limb | Control limb | p-value |
|----|-------------------|--------------|---------|
| T5 | 74.14 ± 9.56      | 57.50 ± 7.77 | 0.061   |
| T6 | 79.28 ± 4.82      | 59.00 ± 2.82 | < 0.001 |
| T7 | 79.71 ± 4.78      | 60.00 ± 4.24 | < 0.001 |

9 Values are n (%) or mean ± SD, as appropriate.

10

11
